# Supplementary material for: Sphingosine-1-phosphate receptor modulator FTY720 attenuates experimental myeloperoxidase-ANCA vasculitis in a T cell-dependent manner
Source: Oxford University Press journal article supplement (doi:10.1042/cs20200497), 2020-06-01
Supplement: cs-2020-0497_supp.pdf [file cs-2020-0497_supp.pdf]

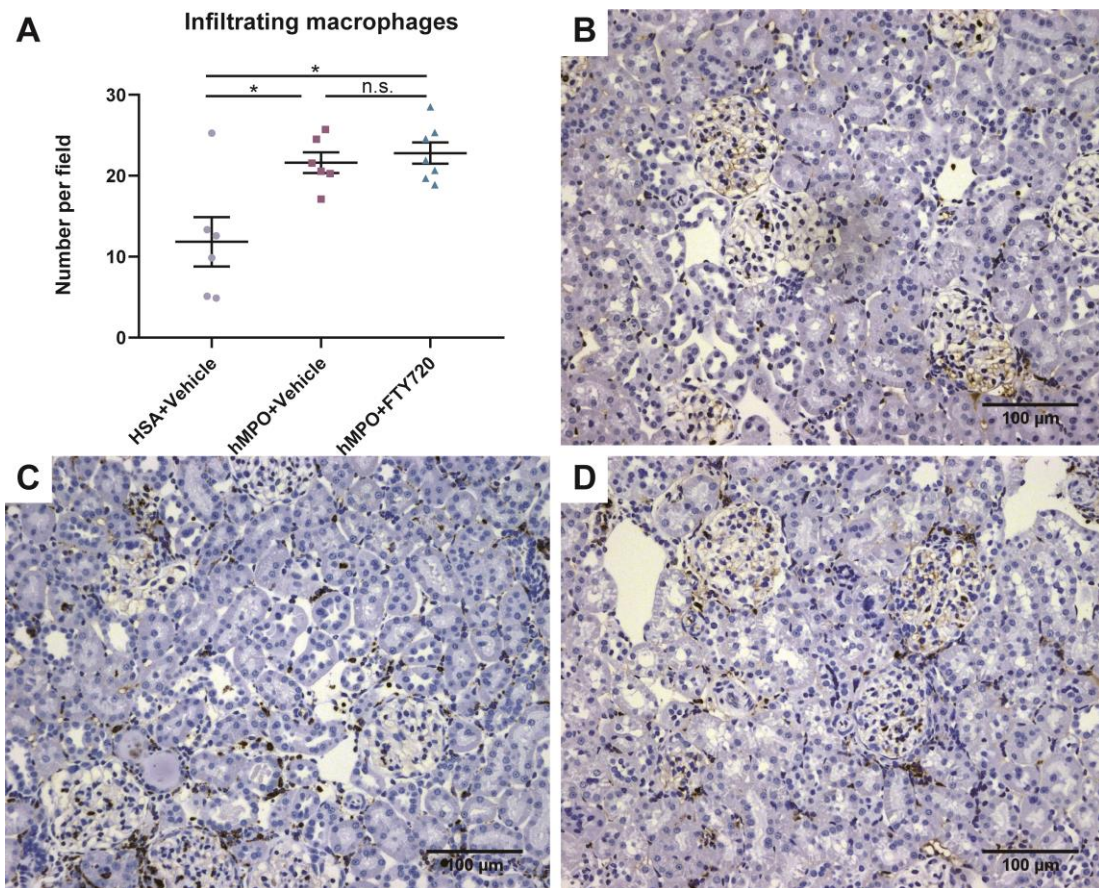

**Figure S1. FTY720 did not influence the renal infiltration of CD68+ macrophages.**

(A) An exacerbated renal infiltration of macrophages was found in EAV, which was not alleviated with FTY720 treatment. Representative immunohistochemistry staining for CD68+ macrophages in renal specimens of normal control (B), EAV (C) or EAV treated with FTY720 (D), Bar = 100 µm. Data represent means ± standard error from six to seven rats per group. \* $P < 0.05$ , \*\* $P < 0.01$  compared with HSA or hMPO treated rats. n.s. no significance.

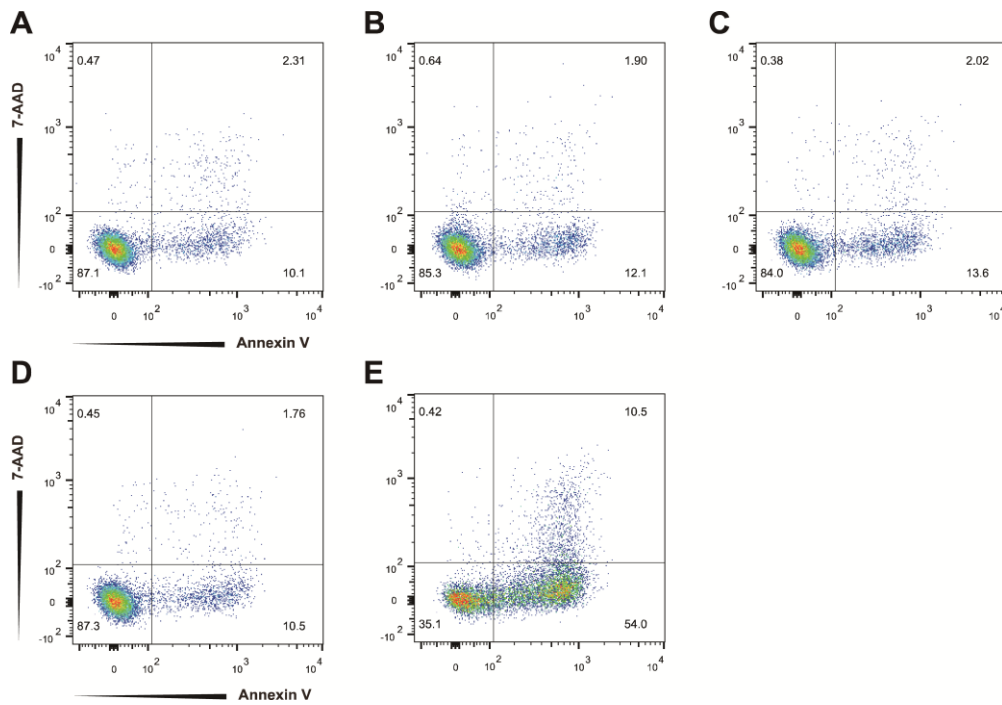

**Figure S2. Representative flow cytometry scatter plots of E6-1 T cells apoptosis upon FTY720 treatment.**

(A) T cells treated with normal serum and vehicle. (B) T cells treated with AAV serum and vehicle. (C) T cells treated with AAV serum and 100 nM FTY720. (D) T cells treated with AAV serum and 1 μM FTY720. (E) T cells treated with AAV serum and 10 μM FTY720. Viable cells were PE Annexin V and 7-AAD negative. Early apoptotic cells were PE Annexin V positive and 7-AAD negative. Late apoptotic or already dead cells were PE Annexin V and 7-AAD positive. Shown are representative scatter plots out of six samples per group.

**Table S1. Primary antibodies used for flow cytometry or immunohistochemistry**

| Antibody                                  | Host   | Catalog number | Dilution | Application          |
|-------------------------------------------|--------|----------------|----------|----------------------|
| FITC anti-rat CD3                         | Mouse  | 201403         | 1:200    | Flow cytometry       |
| FITC Mouse IgM, $\kappa$ Isotype Ctrl     | Mouse  | 401606         | 1:200    | Flow cytometry       |
| APC/Cy7 anti-rat CD4                      | Mouse  | 201518         | 1:50     | Flow cytometry       |
| APC/Cy7 Mouse IgG1, $\kappa$ Isotype Ctrl | Mouse  | 400128         | 1:50     | Flow cytometry       |
| PerCP anti-rat CD8a                       | Mouse  | 201712         | 1:50     | Flow cytometry       |
| PerCP Mouse IgG1, $\kappa$ Isotype Ctrl   | Mouse  | 400148         | 1:50     | Flow cytometry       |
| PE/Cy7 anti-rat CD45RA                    | Mouse  | 202316         | 1:100    | Flow cytometry       |
| PE/Cy7 Mouse IgG1, $\kappa$ Isotype Ctrl  | Mouse  | 400126         | 1:100    | Flow cytometry       |
| CD4 (D7D2Z) monoclonal antibody           | Rabbit | 25229          | 1:100    | Immunohistochemistry |
| CD8 (SP16) monoclonal antibody            | Rabbit | MA5-14548      | 1:100    | Immunohistochemistry |
| CD68 (ED1) monoclonal antibody            | Mouse  | MCA341R        | 1:100    | Immunohistochemistry |
